# Supplementary material for: Genomics yields biological and phenotypic insights into bipolar disorder
Source: medRxiv preprint, doi:10.1101/2023.10.07.23296687, version 3 (2024-08-28)
Supplement: Author list and affiliations [file 296687_file05.docx]

## Authors

Kevin S. O’Connell1,2,*, Maria Koromina3,4,5,273, Tracey van der Veen6,273, Toni Boltz7,273, Friederike S. David8,9,273, Jessica Mei Kay Yang10,273, Keng-Han Lin11,273, Xin Wang11,273, Jonathan R. I. Coleman12,13,273, Brittany L. Mitchell14,15,273, Caroline C. McGrouther16,273, Aaditya V. Rangan16,17,273, Penelope A. Lind14,15,18,273, Elise Koch1,2,273, Arvid Harder19,273, Nadine Parker1,2,273, Jaroslav Bendl3,5,20,21,273, Kristina Adorjan22,23,24, Esben Agerbo25,26,27, Diego Albani28, Silvia Alemany29,30,31, Ney Alliey-Rodriguez32,33, Thomas D. Als25,34,35, Till F. M. Andlauer36, Anastasia Antoniou37, Helga Ask38,39, Nicholas Bass6, Michael Bauer40, Eva C. Beins8, Tim B. Bigdeli41,42,43,44, Carsten Bøcker Pedersen25,26,27, Marco P. Boks45, Sigrid Børte46,47,48, Rosa Bosch29,49, Murielle Brum50, Ben M. Brumpton51, Nathalie Brunkhorst-Kanaan50, Monika Budde22, Jonas Bybjerg-Grauholm25,52, William Byerley53, Judit Cabana-Domínguez29,30,31, Murray J. Cairns54,55, Bernardo Carpiniello56, Miquel Casas49,57,58, Pablo Cervantes59, Chris Chatzinakos41,43, Hsi-Chung Chen60,61, Tereza Clarence3,5,20,21, Toni-Kim Clarke62, Isabelle Claus8, Brandon Coombes63, Elizabeth C. Corfield38,64,65, Cristiana Cruceanu59,66, Alfredo Cuellar-Barboza67,68, Piotr M. Czerski69, Konstantinos Dafnas37, Anders M. Dale70, Nina Dalkner71, Franziska Degenhardt8,72, J. Raymond DePaulo73, Srdjan Djurovic74,75, Ole Kristian Drange2,76, Valentina Escott-Price10, Ayman H. Fanous77,78,79, Frederike T. Fellendorf71, I. Nicol Ferrier80, Liz Forty10, Josef Frank81, Oleksandr Frei1,47, Nelson B. Freimer82,83, John F. Fullard3,5,20,21, Julie Garnham84, Ian R. Gizer85, Scott D. Gordon86, Katherine Gordon-Smith87, Tiffany A. Greenwood88, Jakob Grove25,89,90,91, José Guzman-Parra92, Tae Hyon Ha93,94, Tim Hahn95, Magnus Haraldsson96,97, Martin Hautzinger98, Alexandra Havdahl38,39,64, Urs Heilbronner22, Dennis Hellgren19, Stefan Herms8,99,100, Ian B. Hickie101, Per Hoffmann8,99,100, Peter A. Holmans10, Ming-Chyi Huang102, Masashi Ikeda103,104, Stéphane Jamain105, Jessica S. Johnson3,5,106, Lina Jonsson107, Janos L. Kalman22,23, Yoichiro Kamatani108,109, James L. Kennedy110,111,112,113, Euitae Kim93,94,114, Jaeyoung Kim93,115, Sarah Kittel-Schneider116,117, James A. Knowles118, Manolis Kogevinas119, Thorsten M. Kranz50, Kristi Krebs120, Steven A. Kushner121, Catharina Lavebratt122,123, Jacob Lawrence124, Markus Leber125, Heon-Jeong Lee126, Calwing Liao127,128, Susanne Lucae129, Martin Lundberg122,123, Donald J. MacIntyre130, Wolfgang Maier131, Adam X. Maihofer88,132, Dolores Malaspina3,5, Mirko Manchia56,133, Eirini Maratou134, Lina Martinsson135,136, Manuel Mattheisen25,34,35,117,137, Nathaniel W. McGregor138, Melvin G. McInnis139, James D. McKay140, Helena Medeiros141, Andreas Meyer-Lindenberg142,143, Vincent Millischer122,123,144,145, Derek W. Morris146, Paraskevi Moutsatsou134, Thomas W. Mühleisen99,147, Claire O’Donovan84, Catherine M. Olsen148, Georgia Panagiotaropoulou149, Sergi Papiol22,23,29, Antonio F. Pardiñas10, Hye Youn Park93,94, Amy Perry87, Andrea Pfennig40, Claudia Pisanu150, James B. Potash73, Digby Quested151,152, Mark H. Rapaport153, Eline J. Regeer154, John P. Rice155, Margarita Rivera156,157,158, Eva C. Schulte8,22,131, Fanny Senner22,23, Alexey Shadrin1,2,159, Paul D. Shilling88, Engilbert Sigurdsson96,97, Lisa Sindermann8, Lea Sirignano81, Dan Siskind160, Claire Slaney84, Laura G. Sloofman3,5, Olav B. Smeland1,2, Daniel J. Smith161, Janet L. Sobell162, Maria Soler Artigas29,30,31,163, Dan J. Stein164, Frederike Stein9, Mei-Hsin Su165, Heejong Sung166, Beata Świątkowska167, Chikashi Terao109, Markos Tesfaye1,2,75, Martin Tesli1,2,168, Thorgeir E. Thorgeirsson169, Jackson G. Thorp14, Claudio Toma170,171,172, Leonardo Tondo173, Paul A. Tooney174, Shih-Jen Tsai175,176, Evangelia Eirini Tsermpini84, Marquis P. Vawter177, Helmut Vedder178, Annabel Vreeker45,179,180, James T. R. Walters10, Bendik S. Winsvold48,181,182, Stephanie H. Witt81, Hong-Hee Won115,183, Robert Ye127,128, Allan H. Young184,185, Peter P. Zandi73, Lea Zillich81, 23andMe Research Team186, Estonian Biobank research team186, Genoplan Research Team186, HUNT All-In Psychiatry186, PGC-FG Single cell working group186, Genomic Psychiatry Cohort (GPC) Investigators186, Rolf Adolfsson187, Martin Alda84,188, Lars Alfredsson189, Lena Backlund122,123, Bernhard T. Baune190,191,192, Frank Bellivier193,194, Susanne Bengesser71, Wade H. Berrettini195, Joanna M. Biernacka63,68, Michael Boehnke196, Anders D. Børglum25,89,90, Gerome Breen12,13, Vaughan J. Carr171, Stanley Catts197, Sven Cichon8,99,100,147, Aiden Corvin198, Nicholas Craddock10, Udo Dannlowski95, Dimitris Dikeos199, Bruno Etain193,194, Panagiotis Ferentinos12,37, Mark Frye68, Janice M. Fullerton170,200, Micha Gawlik117, Elliot S. Gershon32,201, Fernando S. Goes73, Melissa J. Green170,171, Maria Grigoroiu-Serbanescu202, Joanna Hauser203, Frans A. Henskens204, Jens Hjerling-Leffler205, David M. Hougaard25,52, Kristian Hveem51,206, Nakao Iwata104, Ian Jones10, Lisa A. Jones87, René S. Kahn3,45, John R. Kelsoe88, Tilo Kircher9, George Kirov10, Po-Hsiu Kuo60,207, Mikael Landén19,107, Marion Leboyer105, Qingqin S. Li208,209, Jolanta Lissowska210, Christine Lochner211, Carmel Loughland212, Jurjen J. Luykx213,214, Nicholas G. Martin86,215, Carol A. Mathews216, Fermin Mayoral92, Susan L. McElroy217, Andrew M. McIntosh130, Francis J. McMahon166, Sarah E. Medland14,218,219, Ingrid Melle1,220, Lili Milani120, Philip B. Mitchell171, Gunnar Morken221,222, Ole Mors25,223, Preben Bo Mortensen25,224, Bertram Müller-Myhsok129,225,226, Richard M. Myers227, Woojae Myung93,94, Benjamin M. Neale127,128,228, Caroline M. Nievergelt88,132, Merete Nordentoft25,229, Markus M. Nöthen8, John I. Nurnberger230, Michael C. O’Donovan10, Ketil J. Oedegaard231,232, Tomas Olsson233, Michael J. Owen10, Sara A. Paciga234, Christos Pantelis192,235,236, Carlos N. Pato237, Michele T. Pato237, George P. Patrinos238,239,240,241, Joanna M. Pawlak203, Josep Antoni Ramos-Quiroga29,30,31,57, Andreas Reif50, Eva Z. Reininghaus71, Marta Ribasés29,30,31,163, Marcella Rietschel81, Stephan Ripke127,128,149, Guy A. Rouleau242,243, Panos Roussos3,5,20,21,244, Takeo Saito104, Ulrich Schall245,246, Martin Schalling122,123, Peter R. Schofield170,200, Thomas G. Schulze22,73,81,247,248, Laura J. Scott196, Rodney J. Scott249,250, Alessandro Serretti251,252,253, Jordan W. Smoller128,254,255, Alessio Squassina150, Eli A. Stahl3,5,228, Hreinn Stefansson169, Kari Stefansson169,256, Eystein Stordal257,258, Fabian Streit81,142,259, Patrick F. Sullivan19,260,261, Gustavo Turecki262, Arne E. Vaaler263, Eduard Vieta264, John B. Vincent110, Irwin D. Waldman265, Cynthia S. Weickert170,171,266, Thomas W. Weickert170,171,266, Thomas Werge25,267,268,269, David C. Whiteman148, John-Anker Zwart47,48,181, Howard J. Edenberg270,271, Andrew McQuillin6,274, Andreas J. Forstner8,147,272,274, Niamh Mullins3,4,5,274, Arianna Di Florio10,261,274, Roel A. Ophoff7,82,83,274, Ole A. Andreassen1,2,274,*, for the Bipolar Disorder Working Group of the Psychiatric Genomics Consortium

## Affiliations

1Division of Mental Health and Addiction, Oslo University Hospital, Oslo, Norway. 2NORMENT, University of Oslo, Oslo, Norway. 3Department of Psychiatry, Icahn School of Medicine at Mount Sinai, New York, NY, USA. 4Charles Bronfman Institute for Personalized Medicine, Icahn School of Medicine at Mount Sinai, New York, NY, USA. 5Department of Genetics and Genomic Sciences, Icahn School of Medicine at Mount Sinai, New York, NY, USA. 6Division of Psychiatry, University College London, London, UK. 7Department of Human Genetics, David Geffen School of Medicine, University of California Los Angeles, Los Angeles, CA, USA. 8Institute of Human Genetics, University of Bonn, School of Medicine and University Hospital Bonn, Bonn, Germany. 9Department of Psychiatry and Psychotherapy, University of Marburg, Marburg, Germany. 10Centre for Neuropsychiatric Genetics and Genomics, Division of Psychological Medicine and Clinical Neurosciences, Cardiff University, Cardiff, UK. 1123andMe, Inc., Sunnyvale, CA, USA. 12Social, Genetic and Developmental Psychiatry Centre, King’s College London, London, UK. 13NIHR Maudsley BRC, King’s College London, London, UK. 14Mental Health and Neuroscience, QIMR Berghofer Medical Research Institute, Brisbane, QLD, Australia. 15School of Biomedical Sciences and Faculty of Medicine, The University of Queensland, Brisbane, QLD, Australia. 16New York University, New York, NY, USA. 17Flatiron Institute, New York, NY, USA. 18School of Biomedical Sciences, Queensland University of Technology, Brisbane, QLD, Australia. 19Department of Medical Epidemiology and Biostatistics, Karolinska Institutet, Stockholm, Sweden. 20Center for Disease Neurogenomics, Icahn School of Medicine at Mount Sinai, New York, NY, USA. 21Friedman Brain Institute, Icahn School of Medicine at Mount Sinai, New York, NY, USA. 22Institute of Psychiatric Phenomics and Genomics (IPPG), LMU University Hospital, LMU Munich, Munich, Germany. 23Department of Psychiatry and Psychotherapy, University Hospital, LMU Munich, Munich, Germany. 24University Hospital of Psychiatry and Psychotherapy, University of Bern, Switzerland. 25iPSYCH, The Lundbeck Foundation Initiative for Integrative Psychiatric Research, Denmark. 26National Centre for Register-Based Research, Aarhus University, Aarhus, Denmark. 27Centre for Integrated Register-based Research, Aarhus University, Aarhus, Denmark. 28Department of Neuroscience, Istituto Di Ricerche Farmacologiche Mario Negri IRCCS, Milano, Italy. 29Instituto de Salud Carlos III, Biomedical Network Research Centre on Mental Health (CIBERSAM), Madrid, Spain. 30Department of Psychiatry, Hospital Universitari Vall d´Hebron, Barcelona, Spain. 31Psychiatric Genetics Unit, Group of Psychiatry Mental Health and Addictions, Vall d´Hebron Research Institut (VHIR), Universitat Autònoma de Barcelona, Barcelona, Spain. 32Department of Psychiatry and Behavioral Neuroscience, University of Chicago, Chicago, IL, USA. 33Northwestern University, Chicago, IL, USA. 34iSEQ, Center for Integrative Sequencing, Aarhus University, Aarhus, Denmark. 35Department of Biomedicine - Human Genetics, Aarhus University, Aarhus, Denmark. 36Department of Neurology, Klinikum rechts der Isar, School of Medicine, Technical University of Munich, Munich, Germany. 37National and Kapodistrian University of Athens, 2nd Department of Psychiatry, Attikon General Hospital, Athens, Greece. 38PsychGen Centre for Genetic Epidemiology and Mental Health, Norwegian Institute of Public Health, Oslo, Norway. 39PROMENTA Research Centre, Department of Psychology, University of Oslo, Norway. 40Department of Psychiatry and Psychotherapy, University Hospital Carl Gustav Carus, Technische Universität Dresden, Dresden, Germany. 41Department of Psychiatry and Behavioral Sciences, SUNY Downstate Health Sciences University, Brooklyn, NY, USA. 42VA NY Harbor Healthcare System, Brooklyn, NY, USA. 43Institute for Genomics in Health, SUNY Downstate Health Sciences University, Brooklyn, NY, USA. 44Department of Epidemiology and Biostatistics, School of Public Health, SUNY Downstate Health Sciences University, Brooklyn, NY, USA. 45Psychiatry, Brain Center UMC Utrecht, Utrecht, The Netherlands. 46Research and Communication Unit for Musculoskeletal Health, Division of Clinical Neuroscience, Oslo University Hospital, Ullevål, Oslo, Norway. 47Institute of Clinical Medicine, University of Oslo, Oslo, Norway. 48HUNT Center for Molecular and Clinical Epidemiology, Department of Public Health and Nursing, Faculty of Medicine and Health Sciences, Norwegian University of Science and Technology, Trondheim, Norway. 49Programa SJD MIND Escoles, Hospital Sant Joan de Déu, Institut de Recerca Sant Joan de Déu, Esplugues de Llobregat, Spain. 50Department of Psychiatry, Psychosomatic Medicine and Psychotherapy, University Hospital Frankfurt, Frankfurt am Main, Germany. 51K. G. Jebsen Center for Genetic Epidemiology, Department of Public Health and Nursing, Faculty of Medicine and Health Sciences, Norwegian University of Science and Technology, Trondheim, Norway. 52Center for Neonatal Screening, Department for Congenital Disorders, Statens Serum Institut, Copenhagen, Denmark. 53Psychiatry, University of California San Francisco, San Francisco, CA, USA. 54School of Biomedical Sciences and Pharmacy, The University of Newcastle, Callaghan, NSW, Australia. 55Precision Medicine Research Program, Hunter Medical Research Institute, New Lambton, NSW, Australia. 56Section of Psychiatry, Department of Medical Sciences and Public Health, University of Cagliari, Italy. 57Department of Psychiatry and Forensic Medicine, Universitat Autònoma de Barcelona, Barcelona, Spain. 58Fundació Privada d’Investigació Sant Pau (FISP), Barcelona, Spain. 59Department of Psychiatry, Mood Disorders Program, McGill University Health Center, Montreal, QC, Canada. 60Department of Psychiatry, National Taiwan University Hospital, Taipei, Taiwan. 61Department of Psychiatry, College of Medicine, National Taiwan University, Taipei, Taiwan. 62Division of Psychiatry, University of Edinburgh, Edinburgh, UK. 63Department of Quantitative Health Sciences Research, Mayo Clinic, Rochester, MN, USA. 64Nic Waals Institute, Lovisenberg Diaconal Hospital, Oslo, Norway. 65Department of Genetics and Bioinformatics, Norwegian Institute of Public Health, Oslo, Norway. 66Department of Physiology and Pharmacology, Karolinska Institutet, Stockholm, Sweden. 67Department of Psychiatry, Universidad Autonoma de Nuevo Leon, Monterrey, Mexico. 68Department of Psychiatry and Psychology, Mayo Clinic, Rochester, MN, USA. 69Department of Psychiatry, Laboratory of Psychiatric Genetics, Poznan University of Medical Sciences, Poznan, Poland. 70Center for Multimodal Imaging and Genetics, Departments of Neurosciences, Radiology, and Psychiatry, University of California, San Diego, CA, USA. 71Medical University of Graz, Division of Psychiatry and Psychotherapeutic Medicine, Graz, Austria. 72Department of Child and Adolescent Psychiatry, Psychosomatics and Psychotherapy, University Hospital Essen, University of Duisburg-Essen, Duisburg, Germany. 73Department of Psychiatry and Behavioral Sciences, Johns Hopkins University School of Medicine, Baltimore, MD, USA. 74Department of Medical Genetics, Oslo University Hospital Ullevål, Oslo, Norway. 75Department of Clinical Science, University of Bergen, Bergen, Norway. 76Department of Psychiatry, Sørlandet hospital, Kristiansand/Arendal, Norway. 77Department of Psychiatry, University of Arizona College of Medicine-Phoenix, Phoenix, AZ, USA. 78Carl T. Hayden Veterans Affairs Medical Center, Phoenix, AZ, USA. 79Banner-University Medical Center, Phoenix, AZ, USA. 80Academic Psychiatry, Newcastle University, Newcastle upon Tyne, UK. 81Department of Genetic Epidemiology in Psychiatry, Central Institute of Mental Health, Medical Faculty Mannheim, Heidelberg University, Mannheim, Germany. 82Center for Neurobehavioral Genetics, Semel Institute for Neuroscience and Human Behavior, Los Angeles, CA, USA. 83Department of Psychiatry and Biobehavioral Science, Semel Institute, David Geffen School of Medicine, University of California, Los Angeles, Los Angeles, CA, USA. 84Department of Psychiatry, Dalhousie University, Halifax, NS, Canada. 85Department of Psychological Sciences, University of Missouri, Columbia, MO, USA. 86Genetics and Computational Biology, QIMR Berghofer Medical Research Institute, Brisbane, QLD, Australia. 87Psychological Medicine, University of Worcester, Worcester, UK. 88Department of Psychiatry, University of California San Diego, La Jolla, CA, USA. 89Department of Biomedicine and the iSEQ Center, Aarhus University, Aarhus, Denmark. 90Center for Genomics and Personalized Medicine, CGPM, Aarhus, Denmark. 91Bioinformatics Research Centre, Aarhus University, Aarhus, Denmark. 92Mental Health Department, University Regional Hospital, Biomedicine Institute (IBIMA), Málaga, Spain. 93Department of Neuropsychiatry, Seoul National University Bundang Hospital, Seongnam, Republic of Korea. 94Department of Neuropsychiatry, Seoul National University College of Medicine, Seoul, Republic of Korea. 95Institute for Translational Psychiatry, University of Münster, Münster, Germany. 96Faculty of Medicine, Department of Psychiatry, School of Health Sciences, University of Iceland, Reykjavik, Iceland. 97Landspitali University Hospital, Reykjavik, Iceland. 98Department of Psychology, Eberhard Karls Universität Tübingen, Tubingen, Germany. 99Department of Biomedicine, University of Basel, Basel, Switzerland. 100Institute of Medical Genetics and Pathology, University Hospital Basel, Basel, Switzerland. 101Brain and Mind Centre, The University of Sydney, Sydney, NSW, Australia. 102Department of Psychiatry, Taipei City Psychiatric Center, Taipei City Hospital, Taipei, Taiwan. 103Department of Psychiatry, Nagoya University Graduate School of Medicine, Nagoya, Japan. 104Department of Psychiatry, Fujita Health University School of Medicine, Toyoake, Japan. 105Univ Paris Est Créteil, INSERM, IMRB, Translational Neuropsychiatry, Créteil, France. 106Department of Psychiatry, UNC Chapel Hill School of Medicine, University of North Carolina at Chapel Hill, Chapel Hill, NC, USA. 107Institute of Neuroscience and Physiology, University of Gothenburg, Gothenburg, Sweden. 108Laboratory of Complex Trait Genomics, Department of Computational Biology and Medical Sciences, Graduate School of Frontier Sciences, The University of Tokyo, Tokyo, Japan. 109Laboratory for Statistical and Translational Genetics, RIKEN Center for Integrative Medical Sciences, Yokohama, Japan. 110Campbell Family Mental Health Research Institute, Centre for Addiction and Mental Health, Toronto, ON, Canada. 111Neurogenetics Section, Centre for Addiction and Mental Health, Toronto, ON, Canada. 112Department of Psychiatry, University of Toronto, Toronto, ON, Canada. 113Institute of Medical Sciences, University of Toronto, Toronto, ON, Canada. 114Department of Brain and Cognitive Sciences, Seoul National University College of Natural Sciences, Seoul, Republic of Korea. 115Samsung Advanced Institute for Health Sciences and Technology (SAIHST), Sungkyunkwan University, Samsung Medical Center, Seoul, Republic of Korea. 116Department of Psychiatry and Neurobehavioral Science, University College Cork, Cork, Ireland. 117Department of Psychiatry, Psychosomatics and Psychotherapy, Center of Mental Health, University Hospital Würzburg, Würzburg, Germany. 118Human Genetics Institute of New Jersey, Rutgers University, Piscataway, NJ, USA. 119ISGlobal, Barcelona, Spain. 120Estonian Genome Centre, Institute of Genomics, University of Tartu, Tartu, Estonia. 121Department of Psychiatry, Erasmus MC, University Medical Center Rotterdam, Rotterdam, The Netherlands. 122Translational Psychiatry, Department of Molecular Medicine and Surgery, Karolinska Institutet, Stockholm, Sweden. 123Center for Molecular Medicine, Karolinska University Hospital, Stockholm, Sweden. 124Psychiatry, North East London NHS Foundation Trust, Ilford, UK. 125Clinic for Psychiatry and Psychotherapy, University Hospital Cologne, Cologne, Germany. 126Department of Psychiatry, Korea University College of Medicine, Seoul, Republic of Korea. 127Analytic and Translational Genetics Unit, Massachusetts General Hospital, Boston, MA, USA. 128Stanley Center for Psychiatric Research, Broad Institute, Cambridge, MA, USA. 129Department of Translational Research in Psychiatry, Max Planck Institute of Psychiatry, Munich, Germany. 130Division of Psychiatry, Centre for Clinical Brain Sciences, The University of Edinburgh, Edinburgh, UK. 131Department of Psychiatry and Psychotherapy, University of Bonn, School of Medicine and University Hospital Bonn, Bonn, Germany. 132Research/Psychiatry, Veterans Affairs San Diego Healthcare System, San Diego, CA, USA. 133Unit of Clinical Psychiatry, University Hospital Agency of Cagliari, Cagliari, Italy. 134National and Kapodistrian University of Athens, Medical School, Clinical Biochemistry Laboratory, Attikon General Hospital, Athens, Greece. 135Department of Clinical Neuroscience, Karolinska Institutet, Stockholm, Sweden. 136Centre for Psychiatry Research, SLSO Region Stockholm, Sweden. 137Department of Clinical Neuroscience, Centre for Psychiatry Research, Karolinska Institutet, Stockholm, Sweden. 138Human and Systems Genetics Working Group, Department of Genetics, Stellenbosch University, Stellenbosch, South Africa. 139Department of Psychiatry, University of Michigan, Ann Arbor, MI, USA. 140Genetic Cancer Susceptibility Group, International Agency for Research on Cancer, Lyon, France. 141Institute for Genomic Health, SUNY Downstate Medical Center College of Medicine, Brooklyn, NY, USA. 142Department of Psychiatry and Psychotherapy, Central Institute of Mental Health, Medical Faculty Mannheim, University of Heidelberg, Mannheim, Germany. 143German Centre for Mental Health (DZPG), Germany. 144Department of Psychiatry and Psychotherapy, Clinical Division of General Psychiatry, Medical University of Vienna, Austria. 145Comprehensive Center for Clinical Neurosciences and Mental Health, Medical University of Vienna, Vienna, Austria. 146Centre for Neuroimaging and Cognitive Genomics (NICOG), School of Biological and Chemical Sciences, University of Galway, Galway, Ireland. 147Institute of Neuroscience and Medicine (INM-1), Research Centre Jülich, Jülich, Germany. 148Population Health, QIMR Berghofer Medical Research Institute, Brisbane, QLD, Australia. 149Department of Psychiatry and Psychotherapy, Charité - Universitätsmedizin, Berlin, Germany. 150Department of Biomedical Sciences, University of Cagliari, Italy. 151Oxford Health NHS Foundation Trust, Warneford Hospital, Oxford, UK. 152Department of Psychiatry, University of Oxford, Warneford Hospital, Oxford, UK. 153Department of Psychiatry and Behavioral Sciences, Emory University School of Medicine, Atlanta, GA, USA. 154Outpatient Clinic for Bipolar Disorder, Altrecht, Utrecht, The Netherlands. 155Department of Psychiatry, Washington University in Saint Louis, Saint Louis, MO, USA. 156Department of Biochemistry and Molecular Biology II, Faculty of Pharmacy, University of Granada, Granada, Spain. 157Institute of Neurosciences ´Federico Olóriz´, Biomedical Research Center (CIBM), University of Granada, Granada, Spain. 158Instituto de Investigación Biosanitaria ibs.GRANADA, Granada, Spain. 159KG Jebsen Centre for Neurodevelopmental disorders, University of Oslo, Oslo, Norway. 160Faculty of Medicine, University of Queensland, Brisbane, QLD, Australia. 161Division of Psychiatry, Centre for Clinical Brain Sciences, University of Edinburgh, Edinburgh, UK. 162Psychiatry and the Behavioral Sciences, University of Southern California, Los Angeles, CA, USA. 163Department of Genetics, Microbiology, and Statistics, Faculty of Biology, Universitat de Barcelona, Barcelona, Spain. 164SAMRC Unit on Risk and Resilience in Mental Disorders, Dept of Psychiatry and Neuroscience Institute, University of Cape Town, Cape Town, South Africa. 165Virginia Institute for Psychiatric and Behavioral Genetics, Virginia Commonwealth University, Richmond, VA, USA. 166Human Genetics Branch, Intramural Research Program, National Institute of Mental Health, Bethesda, MD, USA. 167Department of Environmental Epidemiology, Nofer Institute of Occupational Medicine, Lodz, Poland. 168Department of Mental Disorders, Norwegian Institute of Public Health, Oslo, Norway. 169deCODE Genetics / Amgen, Reykjavik, Iceland. 170Neuroscience Research Australia, Sydney, NSW, Australia. 171Discipline of Psychiatry and Mental Health, School of Clinical Medicine, Faculty of Medicine and Health, University of New South Wales, Sydney, NSW, Australia. 172Centro de Biología Molecular Severo Ochoa, Universidad Autónoma de Madrid and CSIC, Madrid, Spain. 173Department of Psychiatry, Harvard Medical School, Boston, MA, USA. 174School of Biomedical Science and Pharmacy, University of Newcastle, Newcastle, NSW, Australia. 175Department of Psychiatry, Taipei Veterans General Hospital, Taipei, Taiwan. 176Division of Psychiatry, National Yang Ming Chiao Tung University, Taipei, Taiwan. 177Department of Psychiatry and Human Behavior, School of Medicine, University of California, Irvine, CA, USA. 178Psychiatry, Psychiatrisches Zentrum Nordbaden, Wiesloch, Germany. 179Department of Child and Adolescent Psychiatry/Psychology, Erasmus MC Sophia Children Hospital, Erasmus University, Rotterdam, The Netherlands. 180Department of Psychology Education and Child Studies, Erasmus School of Social and Behavioral Sciences, Erasmus University Rotterdam, The Netherlands. 181Department of Research, Innovation and Education, Division of Clinical Neuroscience, Oslo University Hospital, Oslo, Norway. 182Department of Neurology, Oslo University Hospital, Oslo, Norway. 183Samsung Genome Institute, Samsung Medical Center, Sungkyunkwan University School of Medicine, Seoul, Republic of Korea. 184Department of Psychological Medicine, Institute of Psychiatry, Psychology and Neuroscience, King’s College London, London, UK. 185South London and Maudsley NHS Foundation Trust, Bethlem Royal Hospital, Monks Orchard Road, Beckenham, Kent, UK. 186A list of members and affiliations appears in the Supplementary Note. 187Department of Clinical Sciences, Psychiatry, Umeå University Medical Faculty, Umeå, Sweden. 188National Institute of Mental Health, Klecany, Czech Republic. 189Institute of Environmental Medicine, Karolinska Institutet, Stockholm, Sweden. 190Department of Psychiatry, University of Münster, Münster, Germany. 191Department of Psychiatry, Melbourne Medical School, The University of Melbourne, Melbourne, VIC, Australia. 192The Florey Institute of Neuroscience and Mental Health, The University of Melbourne, Parkville, VIC, Australia. 193Université Paris Cité, INSERM, Optimisation Thérapeutique en Neuropsychopharmacologie, UMRS-1144, Paris, France. 194APHP Nord, DMU Neurosciences, GHU Saint Louis-Lariboisière-Fernand Widal, Département de Psychiatrie et de Médecine Addictologique, Paris, France. 195Psychiatry, University of Pennsylvania, Philadelphia, PA, USA. 196Center for Statistical Genetics and Department of Biostatistics, University of Michigan, Ann Arbor, MI, USA. 197University of Queensland, Brisbane, QLD, Australia. 198Neuropsychiatric Genetics Research Group, Dept of Psychiatry and Trinity Translational Medicine Institute, Trinity College Dublin, Dublin, Ireland. 199National and Kapodistrian University of Athens, 1st Department of Psychiatry, Eginition Hospital, Athens, Greece. 200School of Biomedical Sciences, Faculty of Medicine and Health, University of New South Wales, Sydney, NSW, Australia. 201Department of Human Genetics, University of Chicago, Chicago, IL, USA. 202Biometric Psychiatric Genetics Research Unit, Alexandru Obregia Clinical Psychiatric Hospital, Bucharest, Romania. 203Department of Psychiatry, Department of Psychiatric Genetics, Poznan University of Medical Sciences, Poznan, Poland. 204School of Medicine and Public Health, University of Newcastle, Newcastle, NSW, Australia. 205Department of Medical Biochemistry and Biophysics, Karolinska Institutet, Stockholm, Sweden. 206HUNT Research Center, Department of Public Health and Nursing, Faculty of Medicine and Health Sciences, Norwegian University of Science and Technology, Trondheim, Norway. 207Department of Public Health and Institute of Epidemiology and Preventive Medicine, College of Public Health, National Taiwan University, Taipei, Taiwan. 208Neuroscience Therapeutic Area, Janssen Research and Development, LLC, Titusville, NJ, USA. 209JRD Data Science, Janssen Research and Development, LLC, Titusville, NJ, USA. 210Cancer Epidemiology and Prevention, M. Sklodowska-Curie National Research Institute of Oncology, Warsaw, Poland. 211SA MRC Unit on Risk and Resilience in Mental Disorders, Dept of Psychiatry, Stellenbosch University, Stellenbosch, South Africa. 212University of Newcastle, Newcastle, NSW, Australia. 213Department of Psychiatry, Amsterdam University Medical Center, Amsterdam, The Netherlands. 214Department of Psychiatry and Neuropsychology, School for Mental Health and Neuroscience, Maastricht University Medical Center, Maastricht, The Netherlands. 215School of Psychology, The University of Queensland, Brisbane, QLD, Australia. 216Department of Psychiatry and Genetics Institute, University of Florida, Gainesville, FL, USA. 217Research Institute, Lindner Center of HOPE, Mason, OH, USA. 218School of Psychology and Faculty of Medicine, The University of Queensland, Brisbane, QLD, Australia. 219School of Psychology and Counselling, Queensland University of Technology, Brisbane, QLD, Australia. 220Division of Mental Health and Addiction, University of Oslo, Institute of Clinical Medicine, Oslo, Norway. 221Department of Mental Health, Faculty of Medicine and Health Sciences, Norwegian University of Science and Technology (NTNU), Trondheim, Norway. 222Psychiatry, St Olavs University Hospital, Trondheim, Norway. 223Psychosis Research Unit, Aarhus University Hospital - Psychiatry, Risskov, Denmark. 224NCRR and CIRRAU, Aarhus BSS, Aarhus University, Aarhus, Denmark. 225Munich Cluster for Systems Neurology (SyNergy), Munich, Germany. 226University of Liverpool, Liverpool, UK. 227HudsonAlpha Institute for Biotechnology, Huntsville, AL, USA. 228Medical and Population Genetics, Broad Institute, Cambridge, MA, USA. 229Mental Health Services in the Capital Region of Denmark, Mental Health Center Copenhagen, University of Copenhagen, Copenhagen, Denmark. 230Psychiatry, Indiana University School of Medicine, Indianapolis, IN, USA. 231Division of Psychiatry, Haukeland Universitetssjukehus, Bergen, Norway. 232Faculty of Medicine and Dentistry, University of Bergen, Bergen, Norway. 233Department of Clinical Neuroscience and Center for Molecular Medicine, Karolinska Institutet at Karolinska University Hospital, Solna, Sweden. 234Human Genetics and Computational Biomedicine, Pfizer Global Research and Development, Groton, CT, USA. 235Melbourne Neuropsychiatry Centre, Department of Psychiatry, The University of Melbourne, VIC, Australia. 236Monash Institute of Pharmaceutical Sciences (MIPS), Monash University, Parkville, VIC, Australia. 237Rutgers Health, Rutgers University, Piscataway, New Jersey, USA. 238University of Patras, School of Health Sciences, Department of Pharmacy, Laboratory of Pharmacogenomics and Individualized Therapy, Patras, Greece. 239United Arab Emirates University, College of Medicine and Health Sciences, Department of Genetics and Genomics, Al-Ain, United Arab Emirates. 240United Arab Emirates University, Zayed Center for Health Sciences, Al-Ain, United Arab Emirates. 241Erasmus University Medical Center Rotterdam, Faculty of Medicine and Health Sciences, Department of Pathology, Clinical Bioinformatics Unit, Rotterdam, The Netherlands. 242Department of Neurology and Neurosurgery, McGill University, Faculty of Medicine, Montreal, QC, Canada. 243Montreal Neurological Institute and Hospital, McGill University, Montréal, QC, Canada. 244Center for Precision Medicine and Translational Therapeutics, James J. Peters VA Medical Center, Bronx, NY, USA. 245Centre for Brain and Mental Health Research, The University of Newcastle, Newcastle, NSW, Australia. 246Hunter Medical Research Institute, New Lambtion Heights, NSW, Australia. 247Department of Psychiatry and Psychotherapy, University Medical Center Göttingen, Göttingen, Germany. 248Department of Psychiatry and Behavioral Sciences, SUNY Upstate Medical University, Syracuse, NY, USA. 249The School of Biomedical Sciences and Pharmacy, Faculty of Medicine, Health and Wellbeing, University of Newcastle, Newcastle, NSW, Australia. 250Cancer Detection and Therapies Program, Hunter Medical Research Institute, University of Newcastle, Newcastle, NSW, Australia. 251Department of Medicine and Surgery, Kore University of Enna, Enna, Italy. 252Department of Biomedical and Neuromotor Sciences, University of Bologna, Bologna, Italy. 253Oasi Research Institute-IRCCS, Troina, Italy. 254Department of Psychiatry, Massachusetts General Hospital, Boston, MA, USA. 255Psychiatric and Neurodevelopmental Genetics Unit (PNGU), Massachusetts General Hospital, Boston, MA, USA. 256Faculty of Medicine, University of Iceland, Reykjavik, Iceland. 257Department of Psychiatry, Hospital Namsos, Namsos, Norway. 258Department of Neuroscience, Norges Teknisk Naturvitenskapelige Universitet Fakultet for naturvitenskap og teknologi, Trondheim, Norway. 259Hector Institute for Artificial Intelligence in Psychiatry, Central Institute of Mental Health, Medical Faculty Mannheim, Heidelberg University, Mannheim, Germany. 260Department of Genetics, University of North Carolina at Chapel Hill, Chapel Hill, NC, USA. 261Department of Psychiatry, University of North Carolina at Chapel Hill, Chapel Hill, NC, USA. 262Department of Psychiatry, McGill University, Montreal, QC, Canada. 263Dept of Psychiatry, Sankt Olavs Hospital Universitetssykehuset i Trondheim, Trondheim, Norway. 264Clinical Institute of Neuroscience, Hospital Clinic, University of Barcelona, IDIBAPS, CIBERSAM, Barcelona, Spain. 265Department of Psychology, Emory University, Atlanta, GA, USA. 266Department of Neuroscience, SUNY Upstate Medical University, Syracuse, NY, USA. 267Institute of Biological Psychiatry, Mental Health Services, Copenhagen University Hospital, Copenhagen, Denmark. 268Department of Clinical Medicine, University of Copenhagen, Copenhagen, Denmark. 269Center for GeoGenetics, GLOBE Institute, University of Copenhagen, Copenhagen, Denmark. 270Biochemistry and Molecular Biology, Indiana University School of Medicine, Indianapolis, IN, USA. 271Department of Medical and Molecular Genetics, Indiana University, Indianapolis, IN, USA. 272Centre for Human Genetics, University of Marburg, Marburg, Germany. 273These authors contributed equally as second authors: Maria Koromina, Tracey van der Veen, Toni Boltz, Friederike S. David, Jessica Mei Kay Yang, Keng-Han Lin, Xin Wang, Jonathan R. I. Coleman, Brittany L. Mitchell, Caroline C. McGrouther, Aaditya V. Rangan, Penelope A. Lind, Elise Koch, Arvid Harder, Nadine Parker, Jaroslav Bendl. 274These authors jointly supervised this work: Andrew McQuillin, Andreas J. Forstner, Niamh Mullins, Arianna Di Florio, Roel A. Ophoff, Ole A. Andreassen. *Corresponding authors.
